# Supplementary material for: Thiophene/selenophene-based S-shaped double helicenes: regioselective synthesis and structures
Source: publisher site journal article supplement (doi:10.3762/bjoc.18.81), 2022-07-08
Supplement: Additional file 2 [file 1860-5397-18-81-S2.pdf]

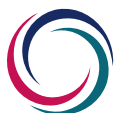

## Supporting Information

for

### **Thiophene/selenophene-based S-shaped double helicenes: regioselective synthesis and structures**

Mengjie Wang, Lanping Dang, Wan Xu, Zhiying Ma, Liulu Shao, Guangxia Wang,  
Chunli Li and Hua Wang

*Beilstein J. Org. Chem.* **2022**, *18*, 809–817. [doi:10.3762/bjoc.18.81](https://doi.org/10.3762/bjoc.18.81)

### **Supporting crystallographic information for compounds DH-1 and DH-2**

## **Table of contents**

|                                                            |    |
|------------------------------------------------------------|----|
| X-ray crystallographic data for compound <b>DH-1</b> ..... | S2 |
| X-ray crystallographic data for compound <b>DH-2</b> ..... | S5 |

## X-ray crystallographic data

### Complete crystal data for DH-1

Table S1. Crystal data and structure refinement for DH-1.

---

|                                   |                                             |                             |
|-----------------------------------|---------------------------------------------|-----------------------------|
| Identification code               | <b>DH-1</b>                                 |                             |
| Empirical formula                 | $C_{32}H_{26}S_6Si_2$                       |                             |
| Formula weight                    | 659.07                                      |                             |
| Temperature                       | 150.0 K                                     |                             |
| Wavelength                        | 0.71073 Å                                   |                             |
| Crystal system                    | Triclinic                                   |                             |
| Space group                       | P-1                                         |                             |
| Unit cell dimensions              | a = 11.1290(7) Å                            | $\alpha = 108.362(2)^\circ$ |
|                                   | b = 12.1240(7) Å                            | $\beta = 111.318(2)^\circ$  |
|                                   | c = 13.7363(9) Å                            | $\gamma = 100.961(2)^\circ$ |
| Volume                            | 1538.32(17) Å <sup>3</sup>                  |                             |
| Z                                 | 2                                           |                             |
| Density (calculated)              | 1.423 Mg/m <sup>3</sup>                     |                             |
| Absorption coefficient            | 0.546 mm <sup>-1</sup>                      |                             |
| F(000)                            | 684                                         |                             |
| Crystal size                      | 0.14 x 0.12 x 0.08 mm <sup>3</sup>          |                             |
| Theta range for data collection   | 2.284 to 25.499°                            |                             |
| Index ranges                      | -13 ≤ h ≤ 13, -14 ≤ k ≤ 13, -16 ≤ l ≤ 16    |                             |
| Reflections collected             | 19274                                       |                             |
| Independent reflections           | 5716 [R(int) = 0.1014]                      |                             |
| Completeness to theta = 25.242°   | 99.7 %                                      |                             |
| Absorption correction             | Semi-empirical from equivalents             |                             |
| Max. and min. transmission        | 0.7457 and 0.6783                           |                             |
| Refinement method                 | Full-matrix least-squares on F <sup>2</sup> |                             |
| Data / restraints / parameters    | 5716 / 0 / 367                              |                             |
| Goodness-of-fit on F <sup>2</sup> | 1.047                                       |                             |
| Final R indices [I > 2σ(I)]       | R1 = 0.0562, wR2 = 0.0872                   |                             |
| R indices (all data)              | R1 = 0.1093, wR2 = 0.1101                   |                             |
| Extinction coefficient            | n / a                                       |                             |
| Largest diff. peak and hole       | 0.476 and -0.451 e.Å <sup>-3</sup>          |                             |

---

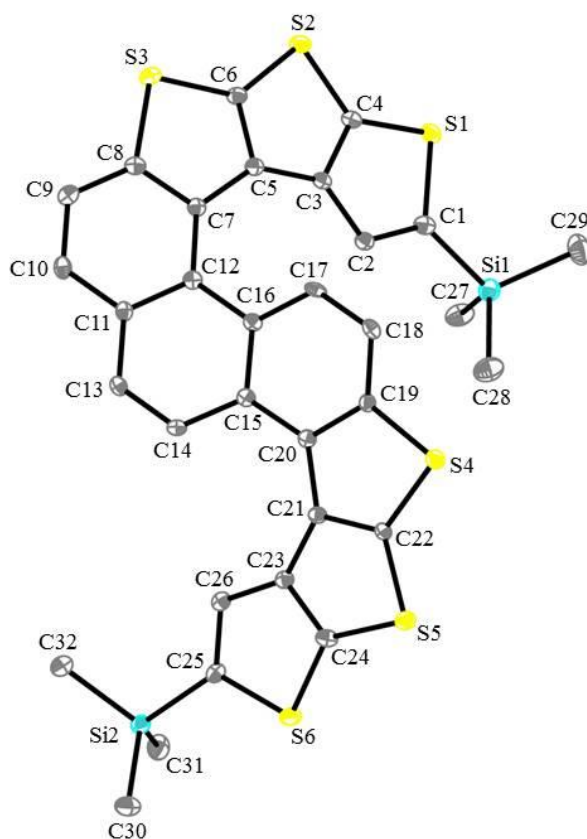

**Figure S1.** The crystal structures for compound **DH-1**. Carbon, sulfur, and silicon atoms are depicted with thermal ellipsoids set at 30% probability level, and all hydrogen atoms are omitted for clarity.

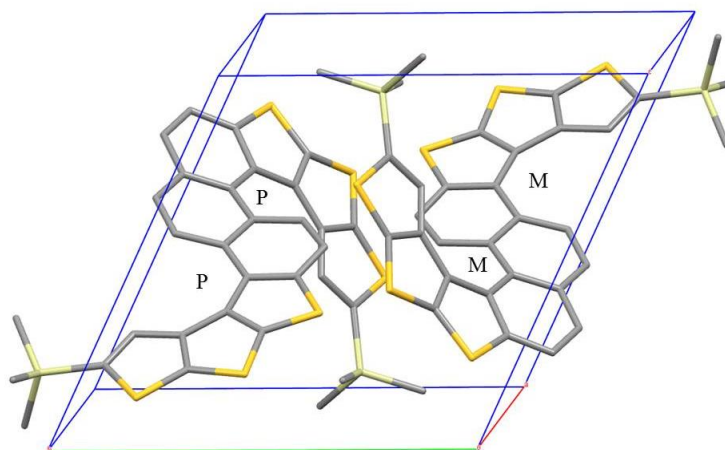

**Figure S2.** Molecular configuration of **DH-1** in one unit cell.

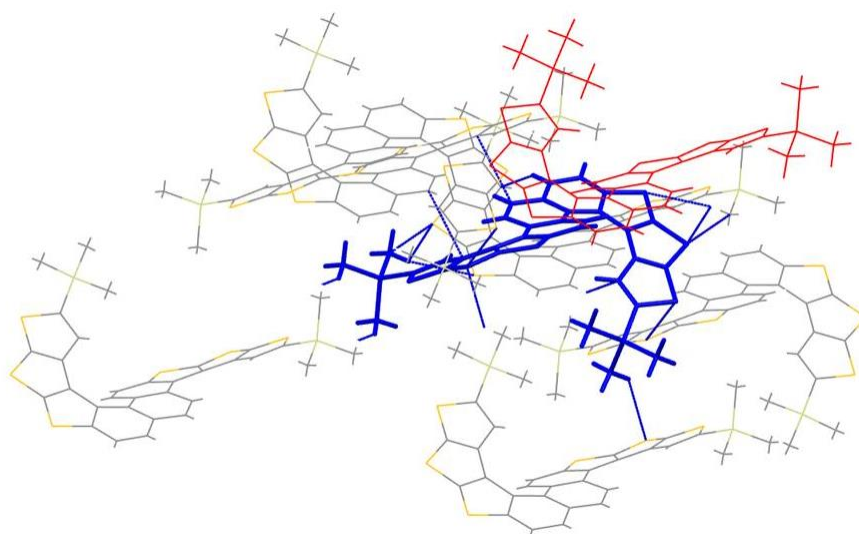

**Figure S3.** Multiple interactions in the crystal packings of **DH-1**.

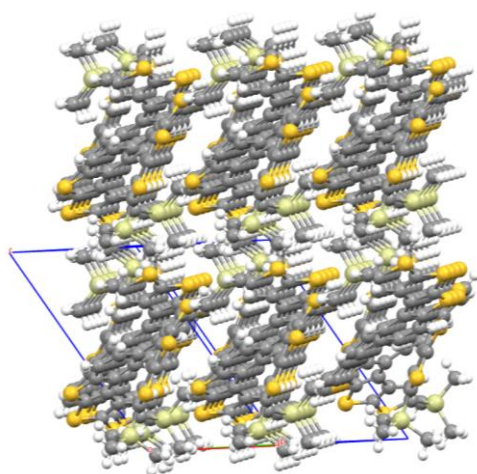

**Figure S4.** Molecular packing of **DH-1**.

## Complete crystal data for DH-2

Table S2. Crystal data and structure refinement for DH-2.

---

|                                   |                                             |                               |
|-----------------------------------|---------------------------------------------|-------------------------------|
| Identification code               | <b>DH-2</b>                                 |                               |
| Empirical formula                 | $C_{32}H_{26}S_2Se_4Si_2$                   |                               |
| Formula weight                    | 846.67                                      |                               |
| Temperature                       | 149.98 K                                    |                               |
| Wavelength                        | 0.71073 Å                                   |                               |
| Crystal system                    | Triclinic                                   |                               |
| Space group                       | P-1                                         |                               |
| Unit cell dimensions              | a = 11.0959(11) Å                           | $\alpha = 112.217(4)^\circ$ . |
|                                   | b = 12.2773(12) Å                           | $\beta = 106.495(3)^\circ$ .  |
|                                   | c = 13.5535(13) Å                           | $\gamma = 99.898(3)^\circ$ .  |
| Volume                            | 1555.7(3) Å <sup>3</sup>                    |                               |
| Z                                 | 2                                           |                               |
| Density (calculated)              | 1.807 Mg/m <sup>3</sup>                     |                               |
| Absorption coefficient            | 4.951 mm <sup>-1</sup>                      |                               |
| F(000)                            | 828                                         |                               |
| Crystal size                      | 0.21 x 0.17 x 0.12 mm <sup>3</sup>          |                               |
| Theta range for data collection   | 2.288 to 28.326°.                           |                               |
| Index ranges                      | -14 ≤ h ≤ 14, -15 ≤ k ≤ 16, -18 ≤ l ≤ 18    |                               |
| Reflections collected             | 23440                                       |                               |
| Independent reflections           | 7708 [R(int) = 0.0726]                      |                               |
| Completeness to theta = 25.242°   | 99.7 %                                      |                               |
| Absorption correction             | Semi-empirical from equivalents             |                               |
| Max. and min. transmission        | 0.7457 and 0.5103                           |                               |
| Refinement method                 | Full-matrix least-squares on F <sup>2</sup> |                               |
| Data / restraints / parameters    | 7708 / 0 / 367                              |                               |
| Goodness-of-fit on F <sup>2</sup> | 1.027                                       |                               |
| Final R indices [I > 2σ(I)]       | R1 = 0.0443, wR2 = 0.0999                   |                               |
| R indices (all data)              | R1 = 0.0690, wR2 = 0.1133                   |                               |
| Extinction coefficient            | n/a                                         |                               |
| Largest diff. peak and hole       | 1.175 and -0.880 e.Å <sup>-3</sup>          |                               |

---

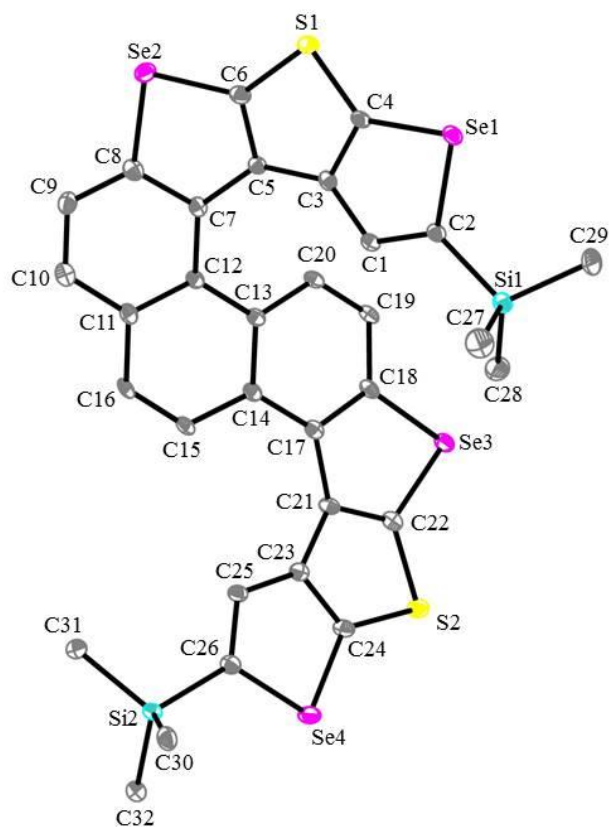

**Figure S5.** The crystal structures for compound **DH-2**. Carbon, selenium, sulfur, and silicon atoms are depicted with thermal ellipsoids set at 30% probability level, and all hydrogen atoms are omitted for clarity.

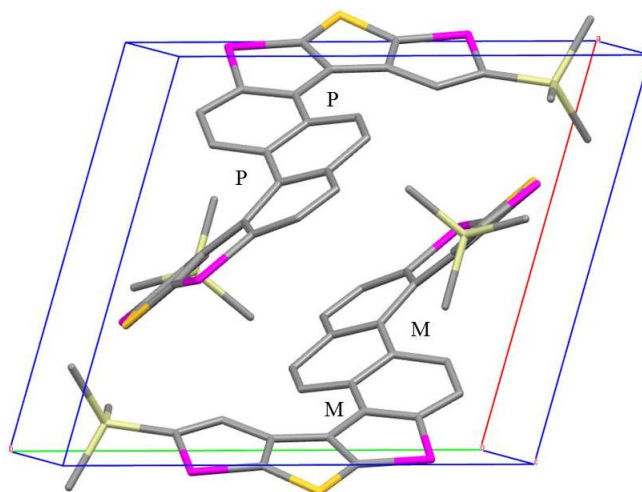

**Figure S6.** Molecular configuration of **DH-2** in one unit cell.

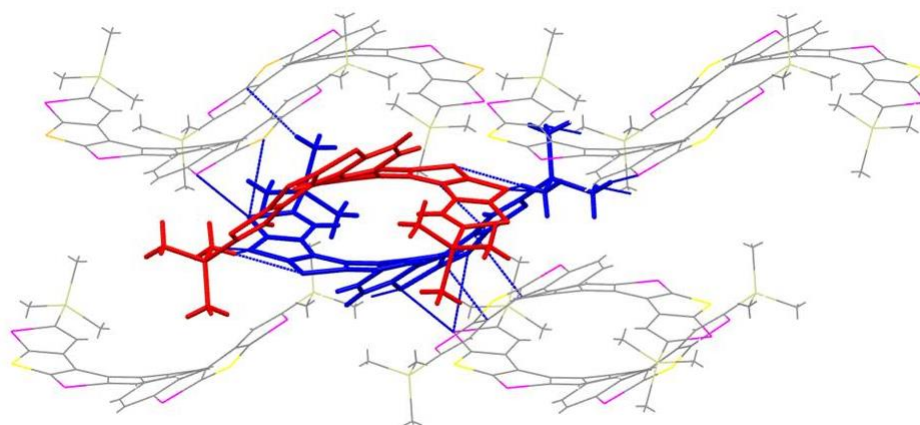

**Figure S7.** Multiple interactions in the crystal packings of **DH-2**

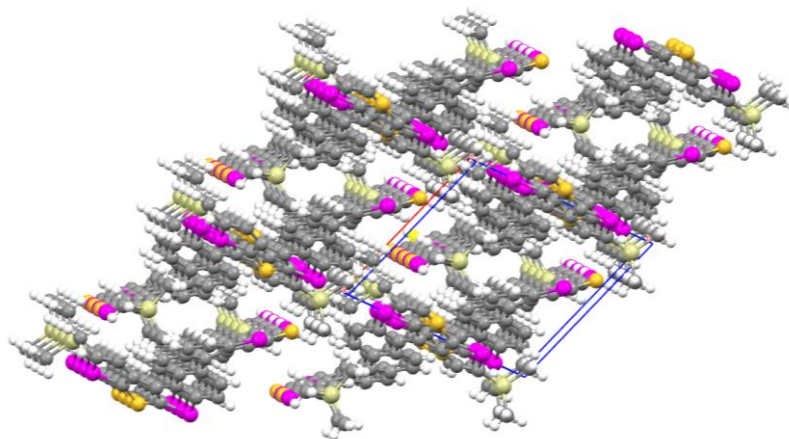

**Figure S8.** Molecular packing of **DH-2**.
